# Supplementary material for: Eco-friendly carbon dot-based nanocomposites in smart construction materials for green-house gases reduction
Source: Royal Society of Chemistry journal article supplement (doi:10.1039/d6ra01080f), 2026-04-07
Supplement: d6ra01080f1.pdf [file d6ra01080f1.pdf]

### Supplementary files (S1)

EDS spectra, shows the successful immobilization of CDs on various metal oxides is confirmed. The EDS spectra show characteristic peaks of C for all samples, while distinct peaks of Si, Zn, and Ti indicate the presence of SiO<sub>2</sub>, ZnO, and TiO<sub>2</sub>, respectively. This shows that the elemental composition of CDs-SiO<sub>2</sub>, CDs-ZnO, and CDs-TiO<sub>2</sub> is successful without the presence of impurities.

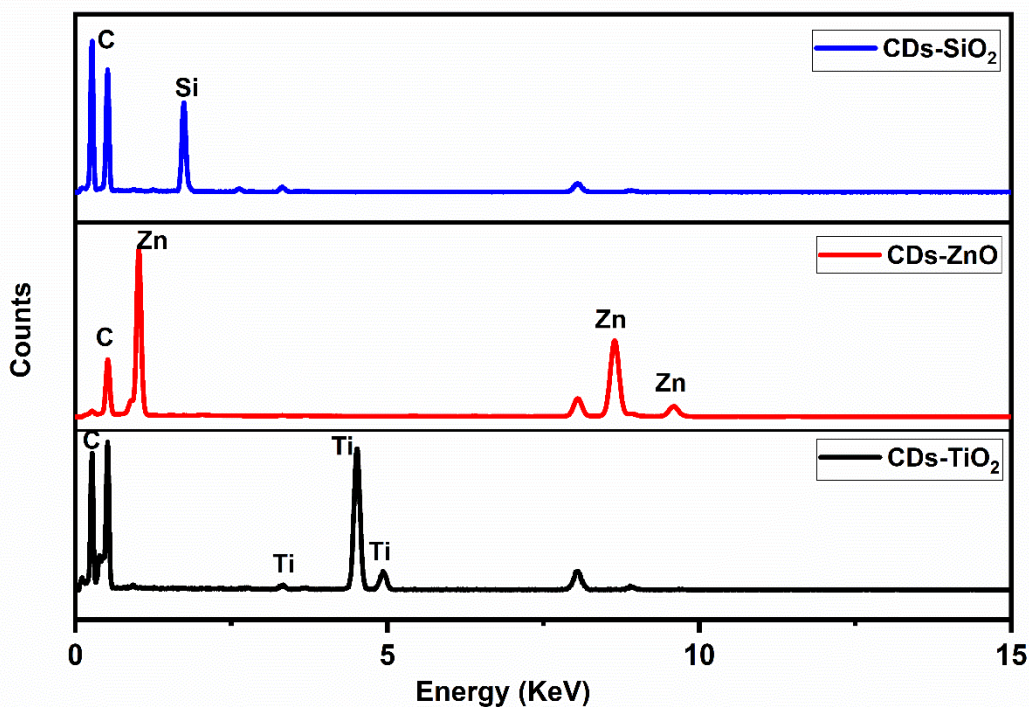

**Fig. S1:** EDS Spectra of CDs/TiO<sub>2</sub>, CDs/ZnO, and CDs/SiO<sub>2</sub> nanocomposites.
